# Supplementary material for: Targeted pandemic containment through identifying local contact network bottlenecks
Source: PubMed Central journal article supplement (PMC8432902; doi:10.1371/journal.pcbi.1009351), 2021-08-30
Supplement: pcbi.1009351.s001.pdf [file pcbi.1009351.s001.pdf]

## S1 Text. CF betweenness is a special case of $\ell_2$ -flow betweenness

Fix  $\Delta = \mathbf{1}_s$  and  $T = \mathbf{1}_t$  for some  $s, t \in V$ . Let  $B$  denote the signed arc-node incidence matrix using an arbitrary orientation of the edges, i.e., the row of edge  $(u, v)$  has two non-zero entries, -1 at column  $u$  and 1 at column  $v$ . Then the optimization problem (see Eq (1) in the main text) giving rise to  $\ell_2$ -flow betweenness can be more succinctly written as

$$\text{minimize } \|f\|_2^2 \quad \text{subject to } B^T f + \mathbf{1}_s \leq \mathbf{1}_t,$$

or equivalently,

$$\text{minimize } \|f\|_2^2 \quad \text{subject to } B^T f + \mathbf{1}_s = \mathbf{1}_t, \quad (1)$$

where  $\|\cdot\|_2$  denotes the  $\ell_2$ -norm. The equality constraint in the second formulation is due to the fact  $\|\mathbf{1}_s\|_1 = \|\mathbf{1}_t\|_1$ , where  $\|\cdot\|_1$  denotes the  $\ell_1$ -norm. Let  $f_{st}$  denote the optimal solution of Problem (1). Then by the optimality condition of Problem (1),  $f_{st}$  satisfies, for some  $y \in \mathbb{R}^{|V|}$ ,

$$f_{st} + By = 0, \quad (2)$$

$$-B^T f_{st} = \mathbf{1}_s - \mathbf{1}_t. \quad (3)$$

Pre-multiply both sides of Eq (2) by  $B^T$ , and substitute Eq (3), we have

$$Ly = B^T By = -B^T f_{st} = \mathbf{1}_s - \mathbf{1}_t, \quad (4)$$

where  $L$  is the Laplacian matrix of  $G$ . Notice that Eq (4) is exactly the Laplacian linear system that defines the absolute potentials  $y$  of a unique  $st$ -current  $\tau_{st}$  (e.g., see Lemma 3 in [1]), where  $\tau(e) = y(u) - y(v)$  for  $e = (u, v) \in E$ . But then according to Eq (2) we have that  $f_{st} = -By$ , which implies

$$|f_{st}(e)| = |y(u) - y(v)|, \quad \text{for } e = (u, v) \in E.$$

Therefore  $|f_{st}(e)| = |\tau_{st}(e)|$  for all  $e$ . Moreover, if  $s = t$ , then one simply has that  $f_{st}(e) = 0$  for all  $e$ . Let  $n = |V|$ . It follows that

$$\mathbb{E}_{\Delta \sim \mathcal{U}_V, T \sim \mathcal{U}_V} [|f_{\Delta, T}^*(e)|] = \frac{1}{n^2} \sum_{s, t \in V} |f_{st}(e)| = \frac{1}{n^2} \sum_{s, t \in V, s \neq t} |f_{st}(e)| = \frac{1}{n^2} \sum_{s, t \in V, s \neq t} |\tau_{st}(e)|,$$

which is exactly the CF betweenness [1] normalized by  $1/n^2$ .

## References

1. Brandes U, Fleischer D. Centrality Measures Based on Current Flow. In: Diekert V, Durand B, editors. STACS 2005. Berlin, Heidelberg: Springer Berlin Heidelberg; 2005. p. 533–544.
