# Supplementary material for: Targeted pandemic containment through identifying local contact network bottlenecks
Source: PubMed Central journal article supplement (PMC8432902; doi:10.1371/journal.pcbi.1009351), 2021-08-30

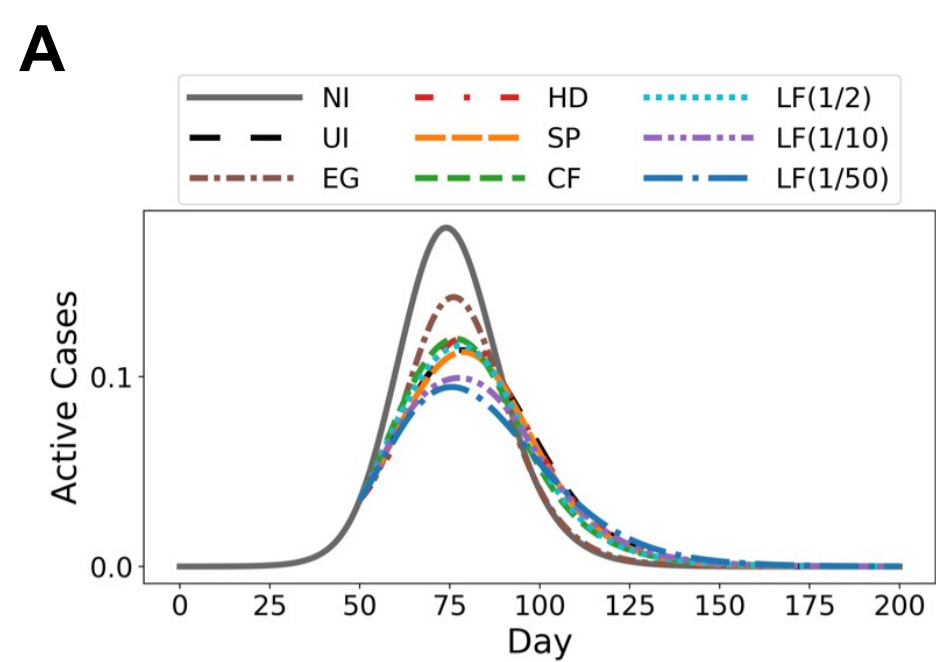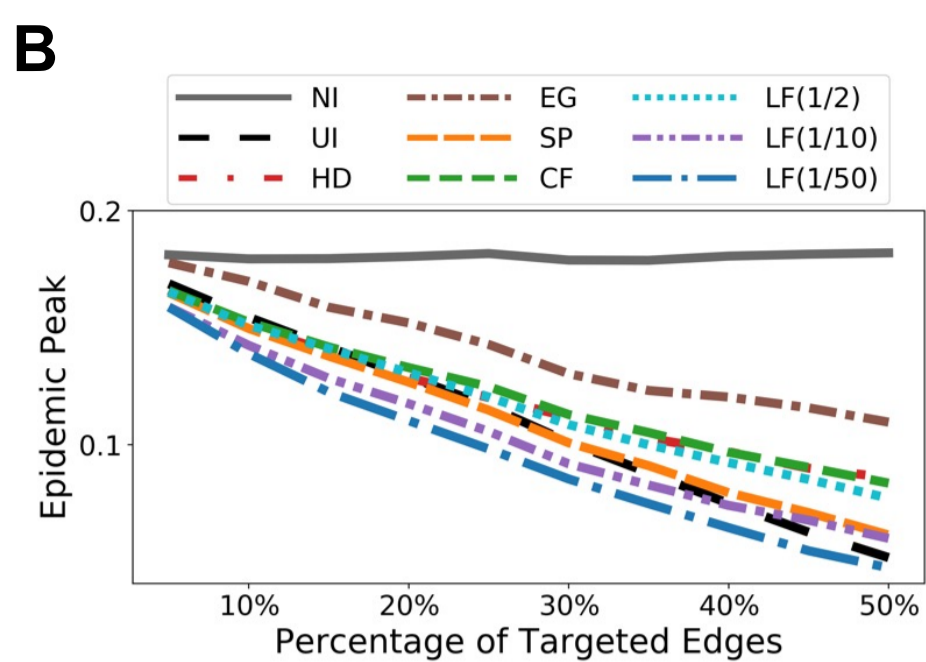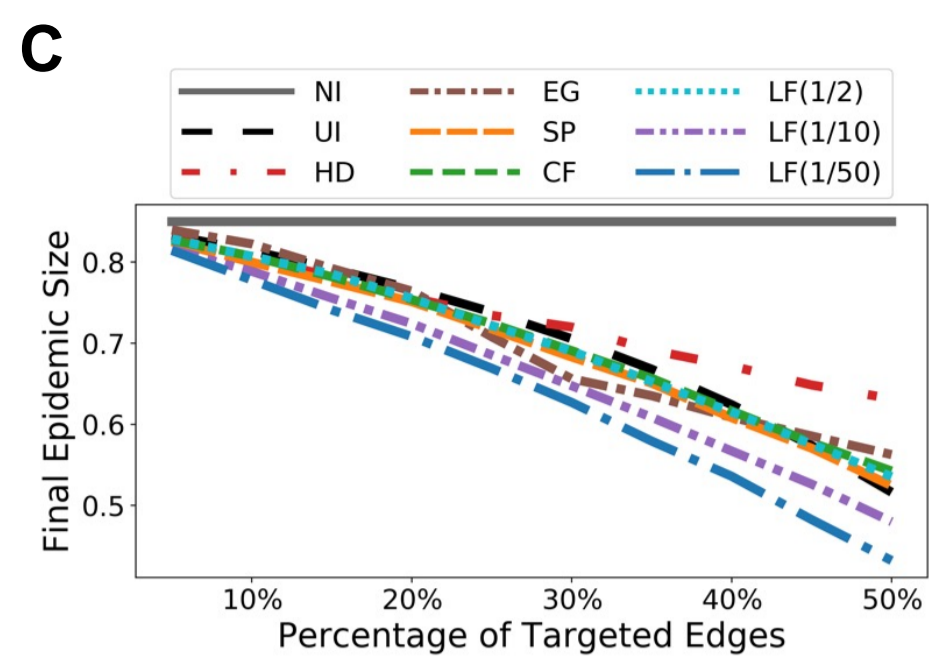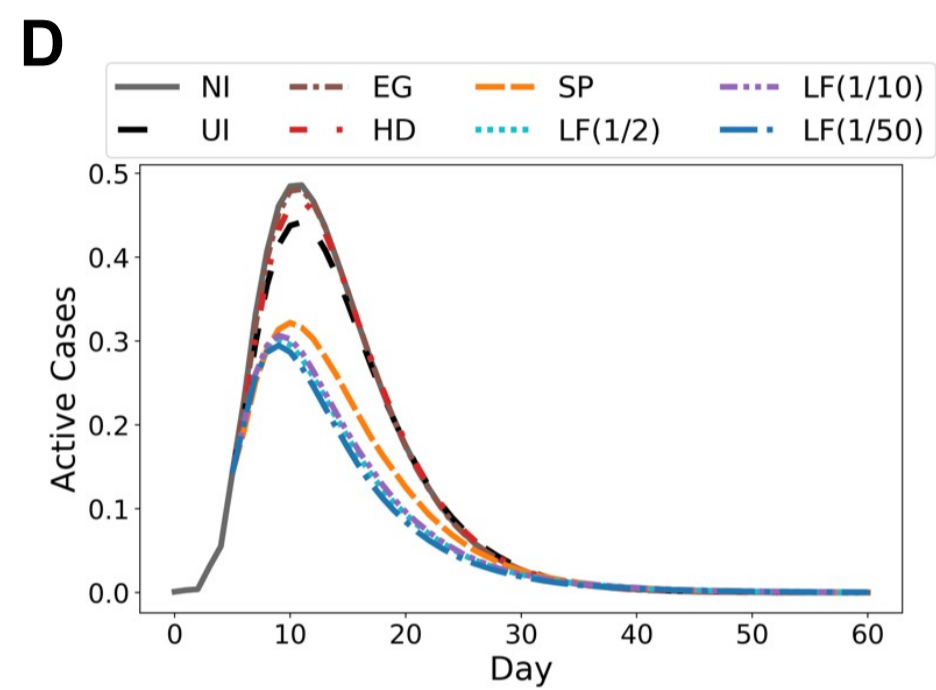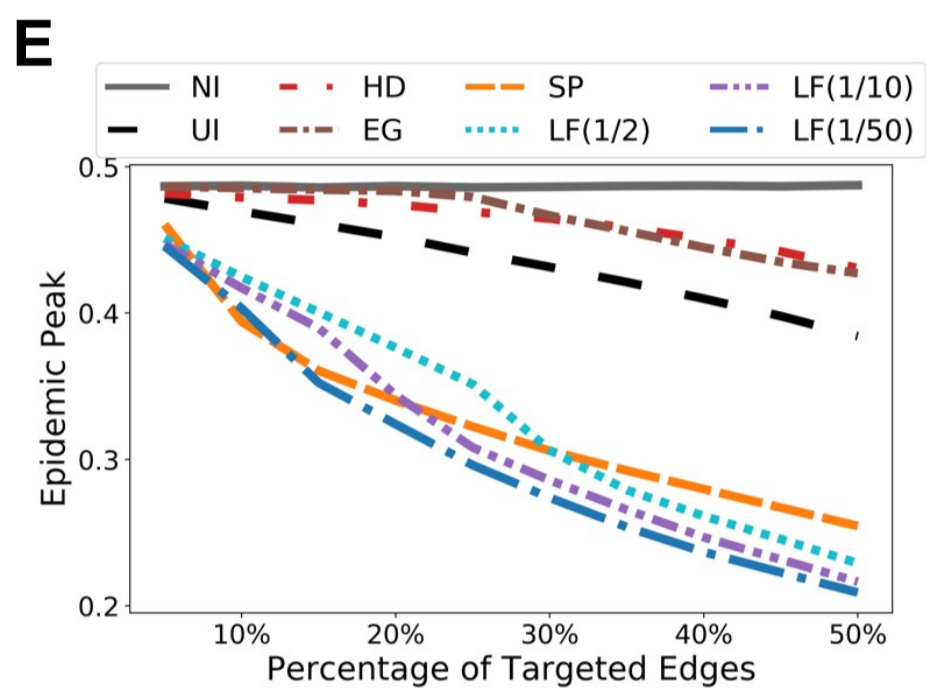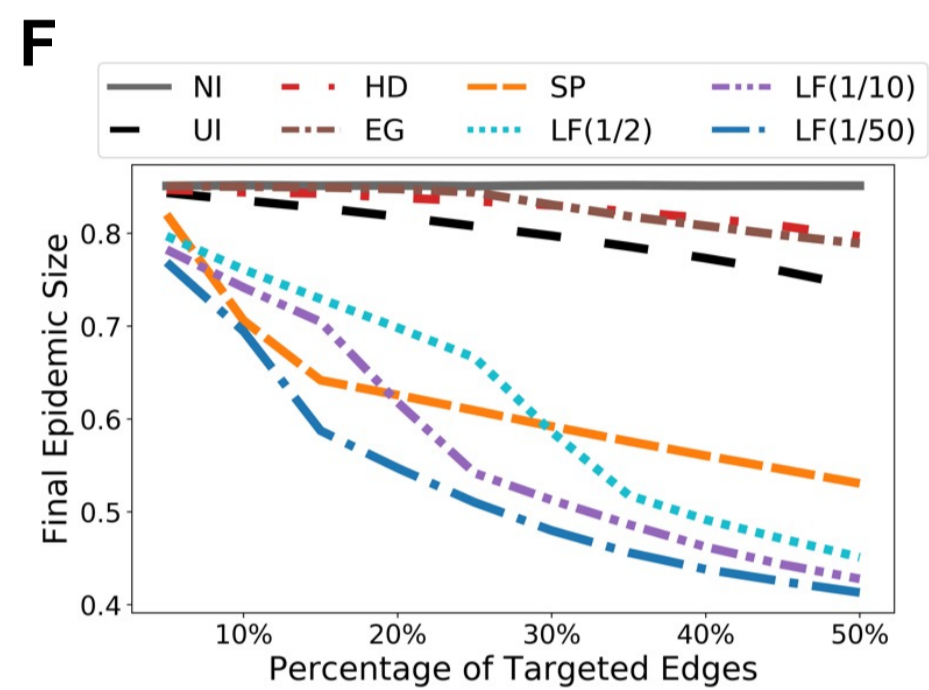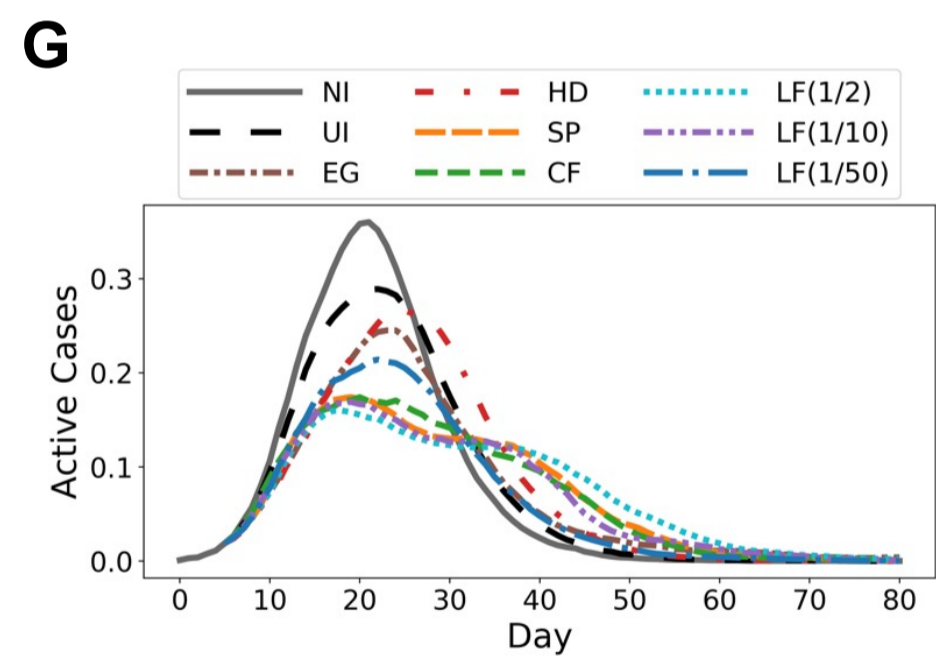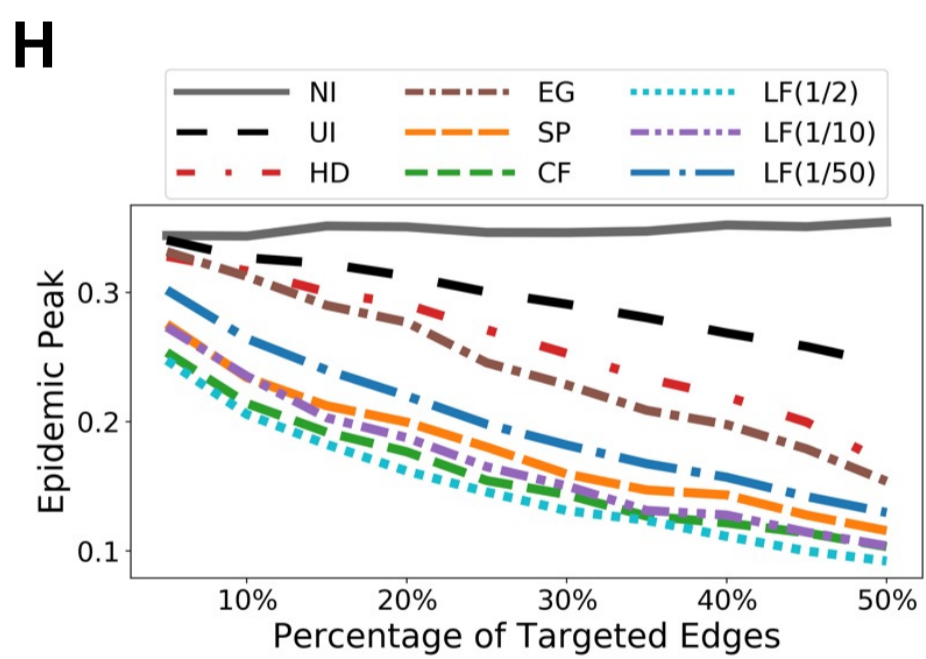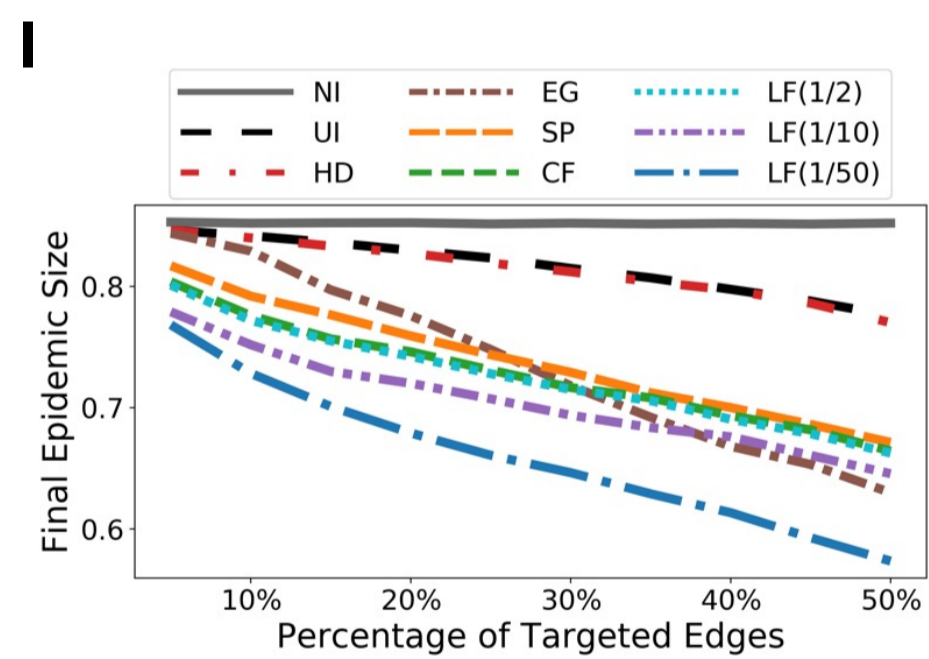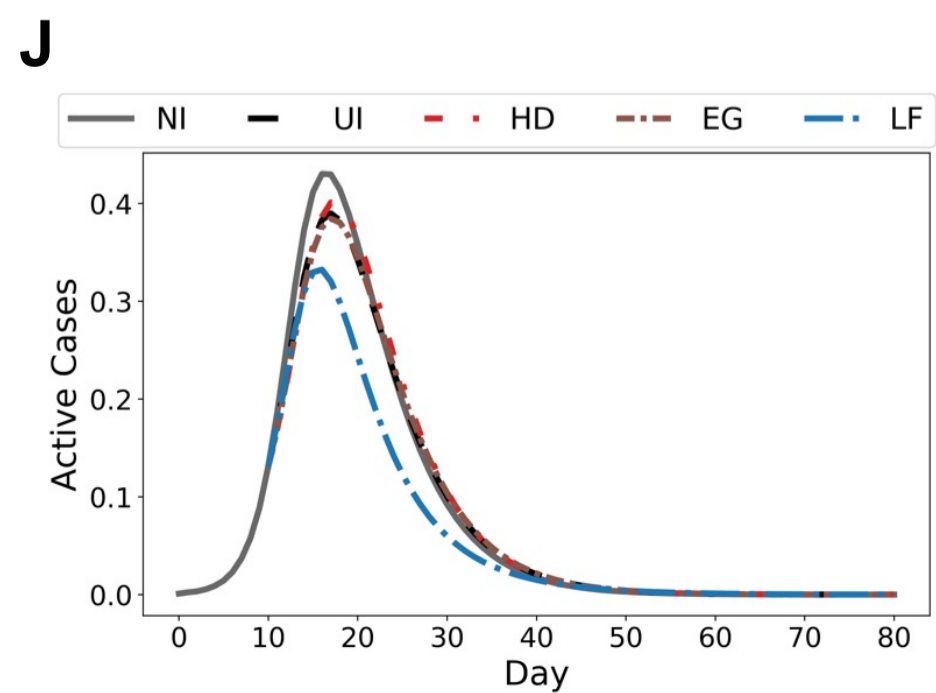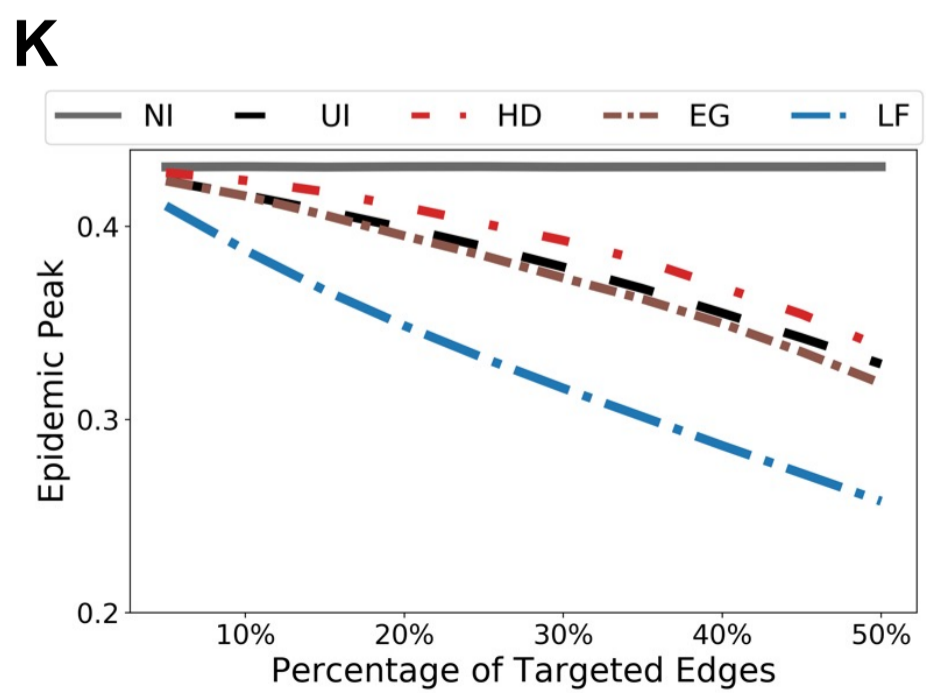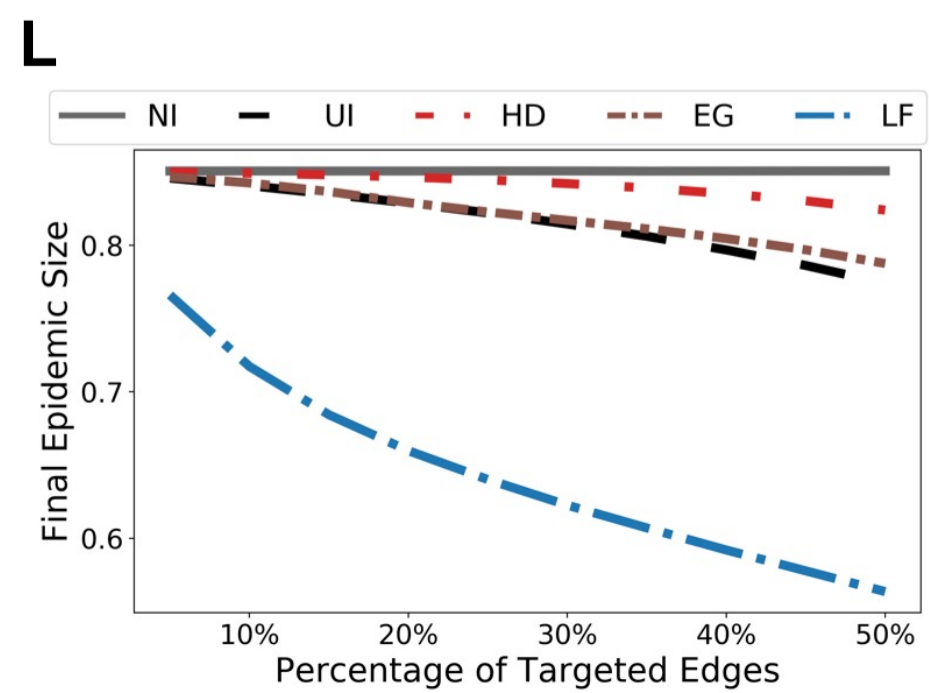

Supplement: pcbi.1009351.s007.pdf [file pcbi.1009351.s007.pdf]
