# Supplementary material for: Targeted pandemic containment through identifying local contact network bottlenecks
Source: PubMed Central journal article supplement (PMC8432902; doi:10.1371/journal.pcbi.1009351), 2021-08-30
Supplement: pcbi.1009351.s011.pdf [file pcbi.1009351.s011.pdf]

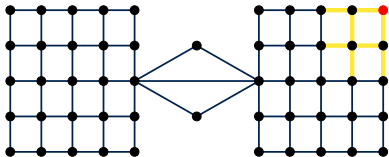

$\lambda = 0.1$

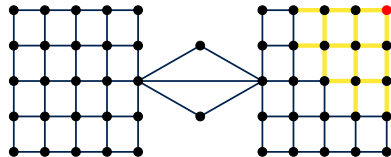

$\lambda = 0.2$

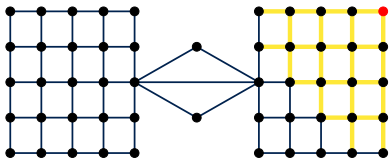

$\lambda = 0.3$

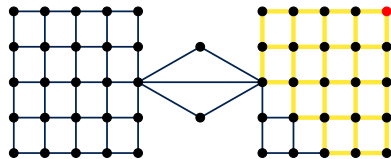

$\lambda = 0.4$

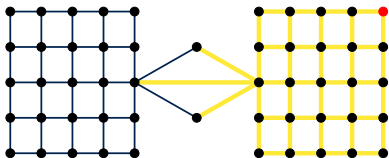

$\lambda = 0.5$

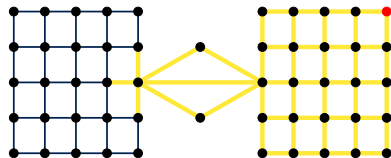

$\lambda = 0.6$

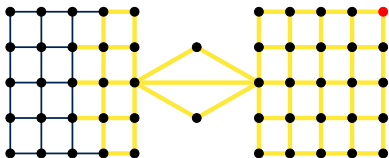

$\lambda = 0.7$

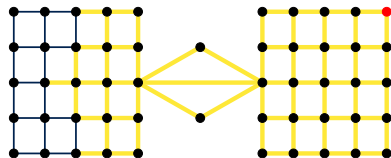

$\lambda = 0.8$

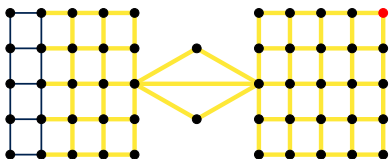

$\lambda = 0.9$

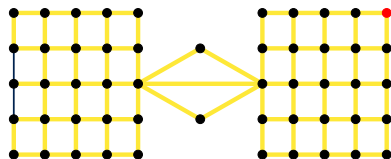

$\lambda = 1.0$
